# Supplementary figures and images for: De Novo Genome Assembly of a Foxtail Millet Cultivar Huagu11 Uncovered the Genetic Difference to the Cultivar Yugu1, and the Genetic Mechanism of Imazethapyr Tolerance
Source: Research Square preprint supplement (doi:10.21203/rs.3.rs-143813/v1), 2021-01-14

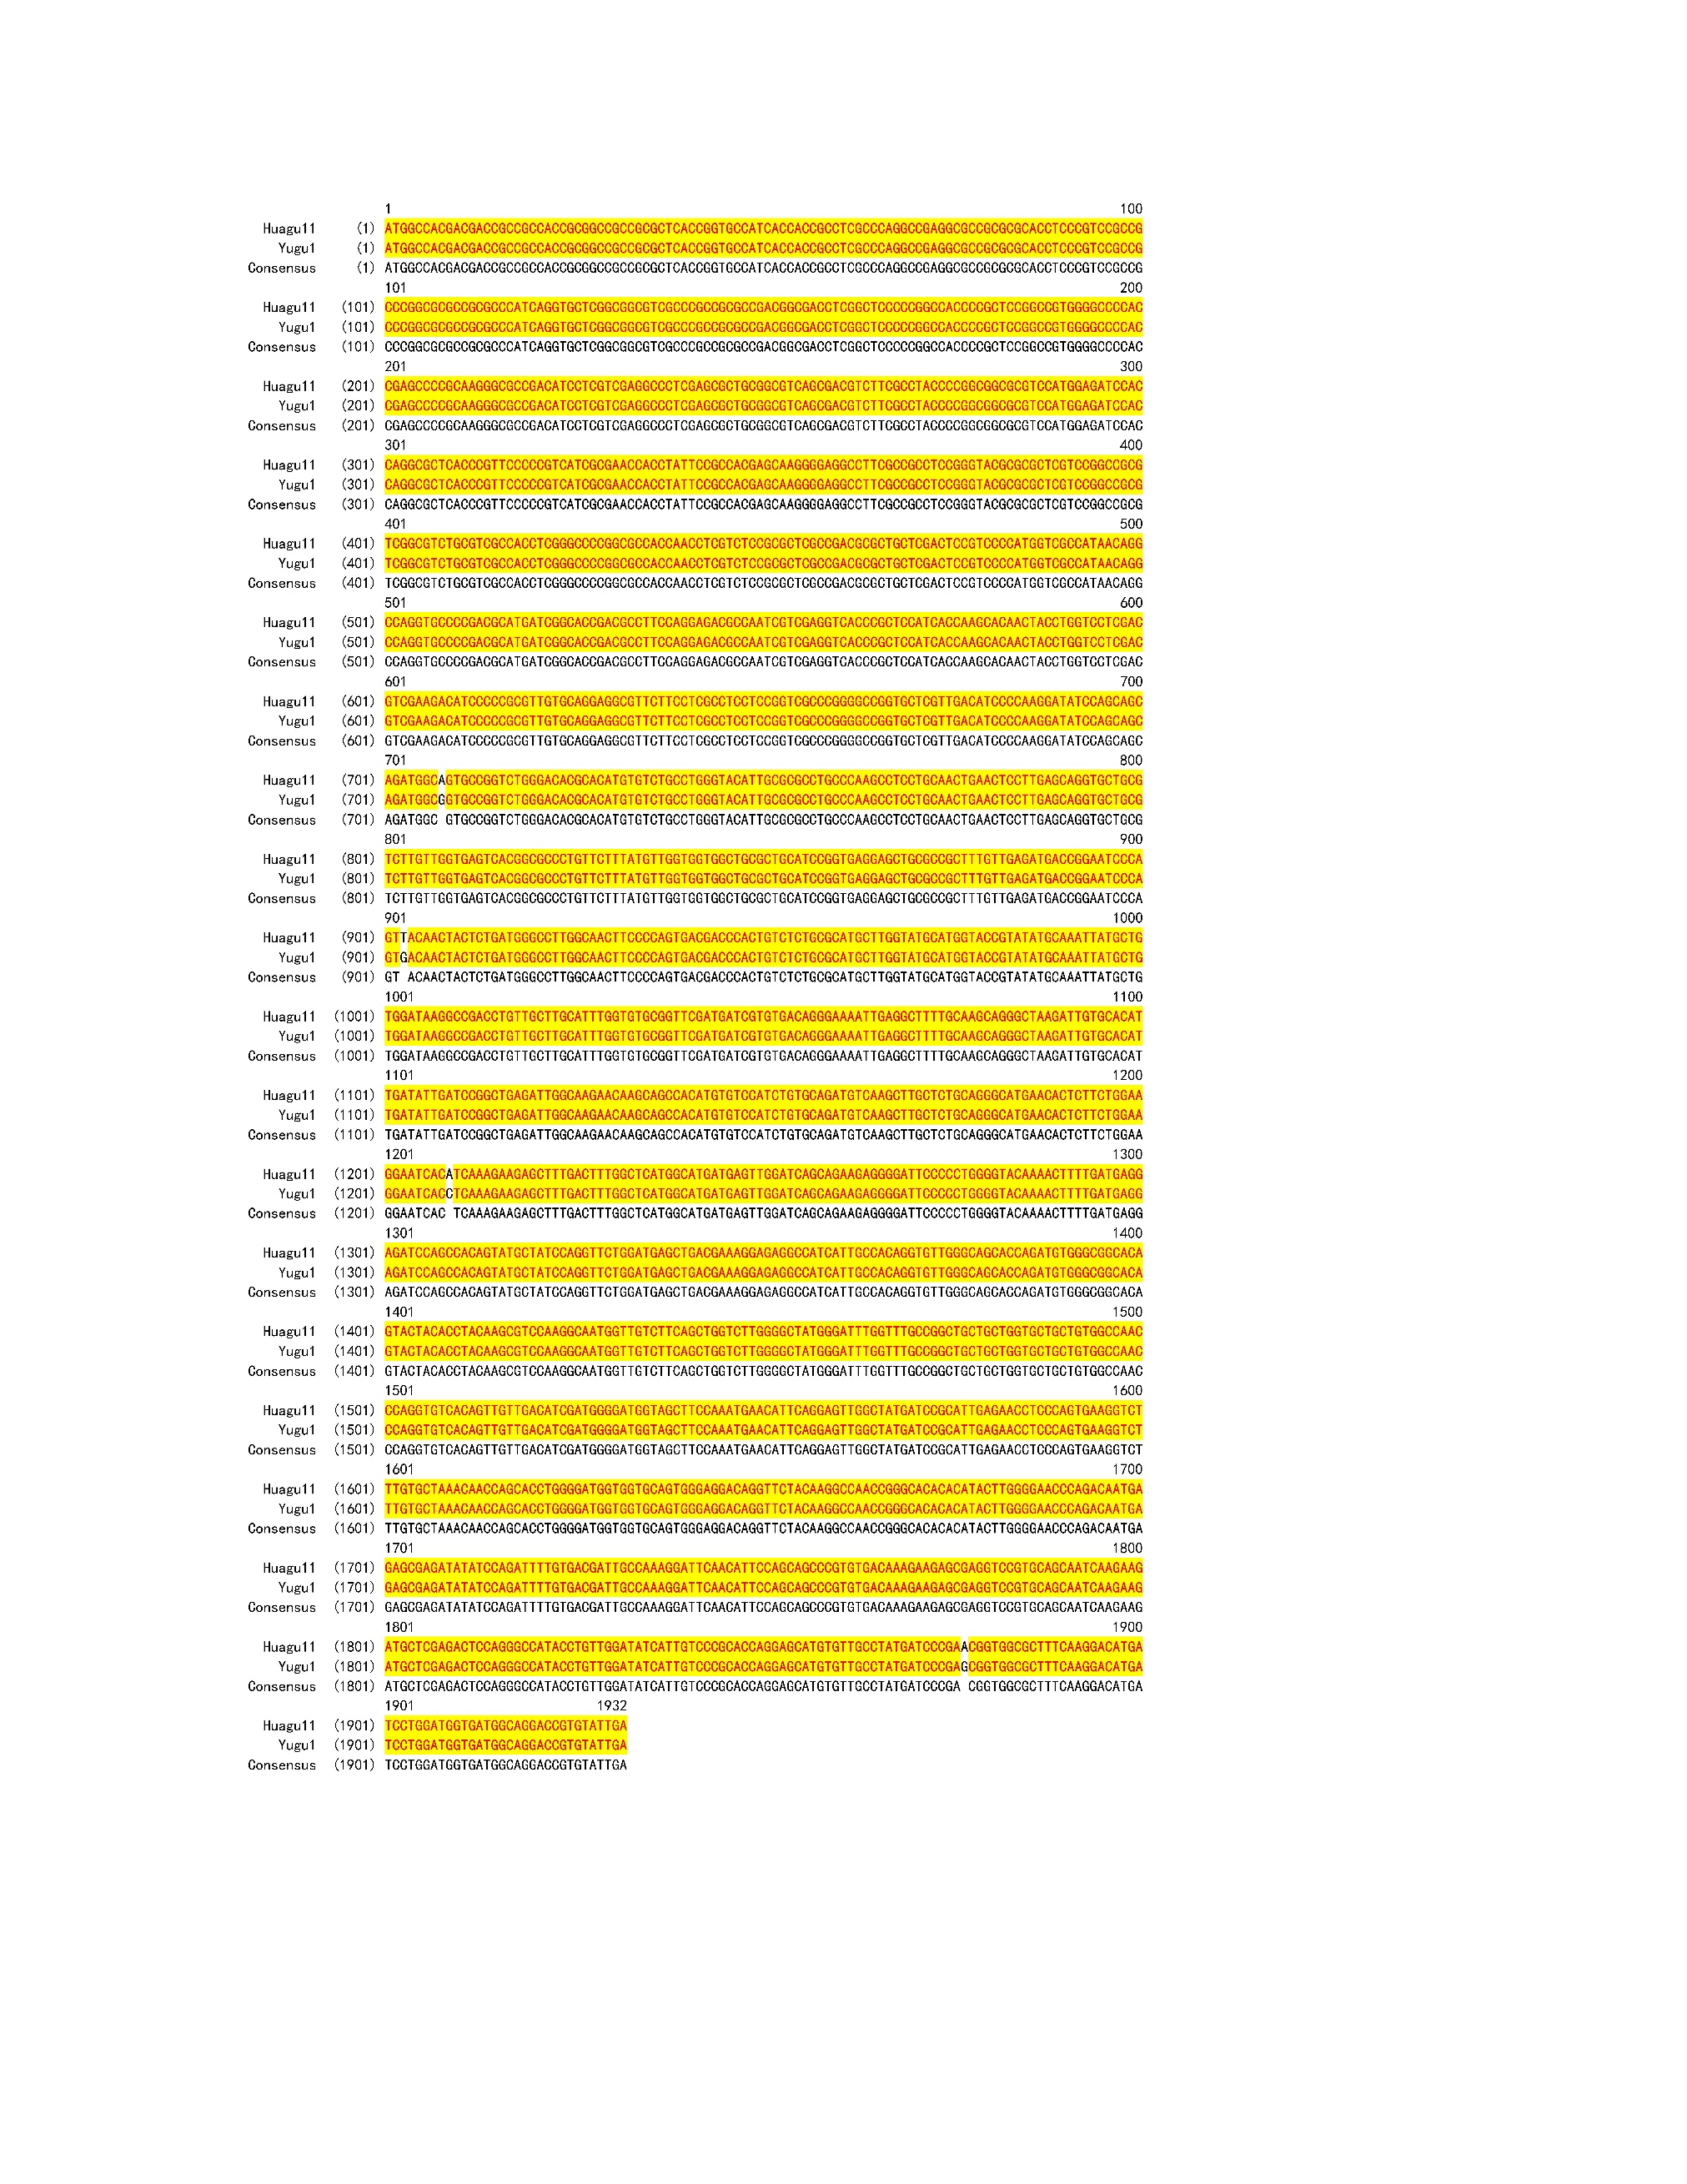


Figure S5. The nucleotide sequence alignment of *AHAS* from the genome of Huagu11 and Yugu1.

Supplement: Supplementary file 3 [file f953d75f4330a3fc9b10694b.docx]
